# Supplementary material for: Unconventional Dual Donor-Acceptor Topologies of Aromatic Rings in Amine-Based Polymeric Tetrahedral Zn(II) Compounds Involving Unusual Non-Covalent Contacts: Antiproliferative Evaluation and Theoretical Studies
Source: MDPI journal article supplement (doi:10.3390/cryst13030382), 2023-02-23
Supplement: s1 [file s1]

# Supplementary information

**Table S1.** Comparison of crystal parameters of compound **2** with the already reported compound

| Crystal Parametres                                                          | <b>2</b>                                                       | <b>CCDC 1852819</b>                                             |
|-----------------------------------------------------------------------------|----------------------------------------------------------------|-----------------------------------------------------------------|
| Emprical formula                                                            | C <sub>5</sub> H <sub>6</sub> Cl <sub>2</sub> ZnN <sub>2</sub> | C <sub>5</sub> H <sub>6</sub> Cl <sub>2</sub> N <sub>2</sub> Zn |
| Formula weight                                                              | 230.39                                                         | 230.39                                                          |
| Temperature (K)                                                             | 100.0                                                          | 103.0                                                           |
| Crystal system                                                              | Monoclinic                                                     | Monoclinic                                                      |
| Space group                                                                 | <i>Cc</i>                                                      | <i>Cc</i>                                                       |
| <i>a</i> /Å                                                                 | 13.6324(10)                                                    | 13.6431(10)                                                     |
| <i>b</i> /Å                                                                 | 7.5986(6)                                                      | 7.6070(3)                                                       |
| <i>c</i> /Å                                                                 | 8.3812(6)                                                      | 8.3818(8)                                                       |
| $\alpha$ °                                                                  | 90                                                             | 90                                                              |
| $\beta$ °                                                                   | 116.926(2)                                                     | 116.946(10)                                                     |
| $\gamma$ °                                                                  | 90                                                             | 90                                                              |
| Volume (Å <sup>3</sup> )                                                    | 774.07(10)                                                     | 775.45(10)                                                      |
| <i>Z</i>                                                                    | 4                                                              | 4                                                               |
| Calculated density (g/cm <sup>3</sup> )                                     | 1.977                                                          | 1.973                                                           |
| Absorption coefficient (mm <sup>-1</sup> )                                  | 10.113                                                         | Not available                                                   |
| <i>F</i> (000)                                                              | 456.0                                                          | 456.0                                                           |
| Crystal size (mm <sup>3</sup> )                                             | 0.32× 0.23 × 0.17                                              | 0.10×0.05×0.03                                                  |
| Index ranges                                                                | -16 ≤ <i>h</i> ≤ 15, -9 ≤ <i>k</i> ≤ 9, -9 ≤ <i>l</i> ≤ 9      | -17 ≤ <i>h</i> ≤ 15, -9 ≤ <i>k</i> ≤ 9, -10 ≤ <i>l</i> ≤ 10     |
| Reflections collected                                                       | 4757                                                           | 1542                                                            |
| Unique data( <i>R</i> <sub>int</sub> )                                      | 1330                                                           | 1541                                                            |
| Refinement method                                                           | Full-matrix least-squares on <i>F</i> <sup>2</sup>             | Full-matrix least-squares on <i>F</i> <sup>2</sup>              |
| Data / restraints / parameters                                              | 1330/2/93                                                      | Not available                                                   |
| Goodness-of-fit on <i>F</i> <sup>2</sup>                                    | 1.072                                                          | 1.115                                                           |
| Final <i>R</i> indices[ <i>I</i> > 2σ ( <i>I</i> )] <i>R</i> 1/ <i>wR</i> 2 | 0.0282/0.0729                                                  | 0.0167/0.0453                                                   |

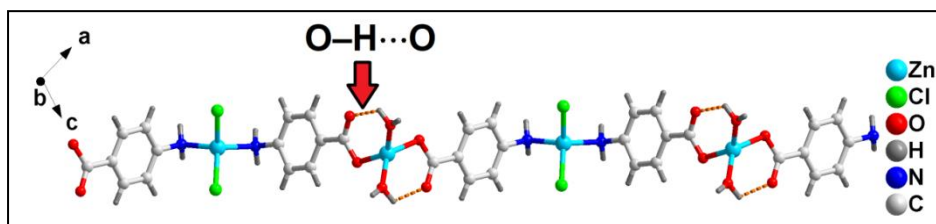

**Figure S1** 1D polymeric chain of compound **1** assisted by intra-molecular O–H...O hydrogen bonding interactions.

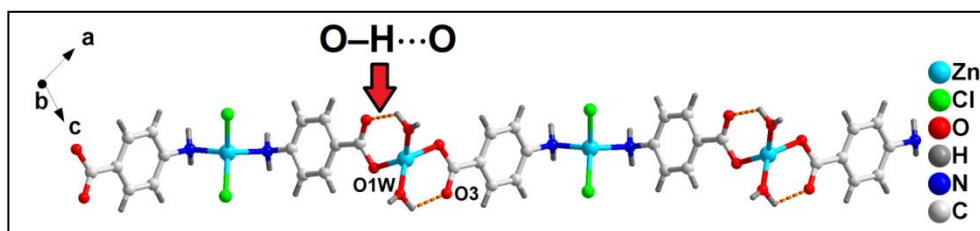

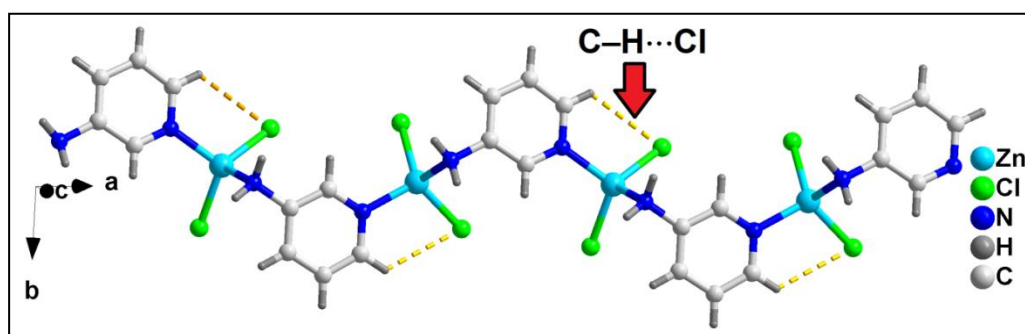

**Figure S2** 1D polymeric chain of compound **2** stabilised by C-H...Cl hydrogen bonding interactions.

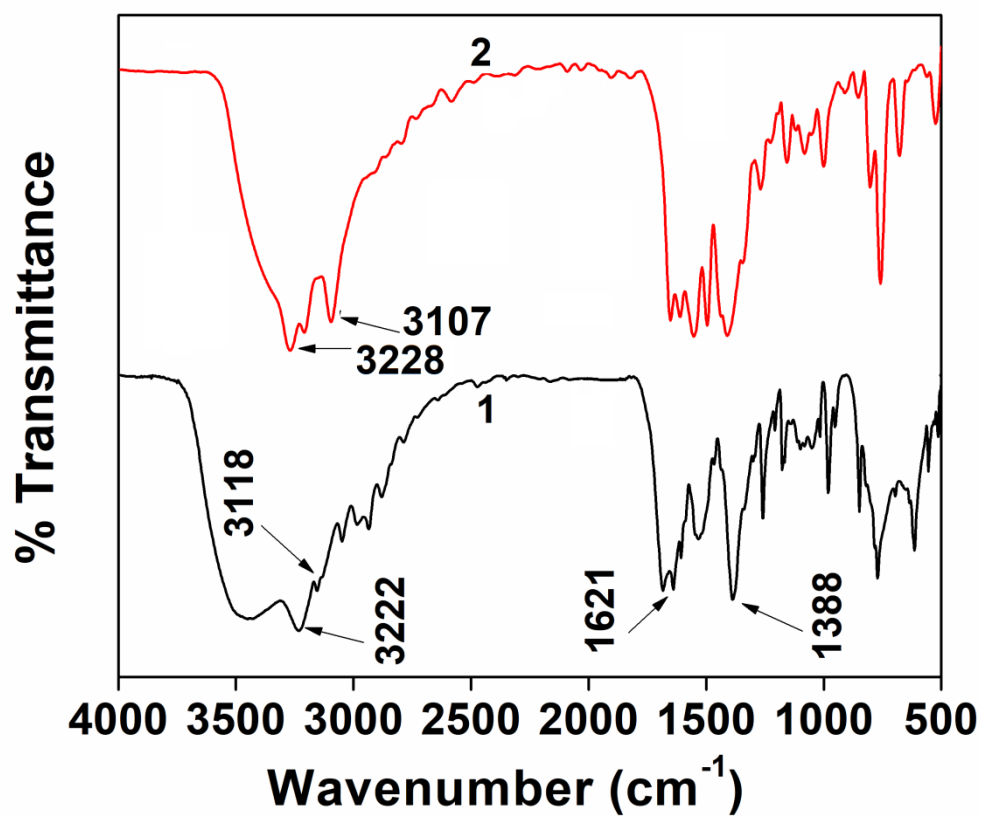

**Figure S3** FT-IR spectra of the compounds **1** and **2**.

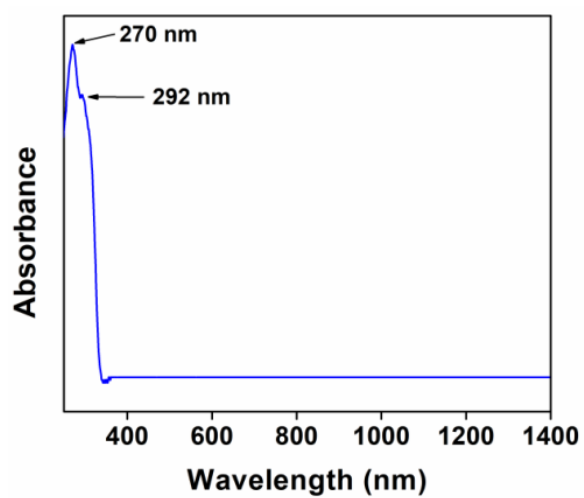

(a)

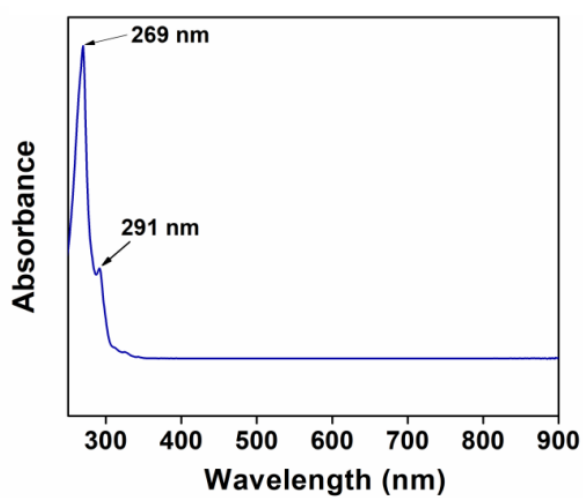

(b)

**Figure S4(a)** UV-Vis-NIR spectrum of **1**; **(b)** UV-Vis spectrum of **1** in water ( $10^{-3}$  M).

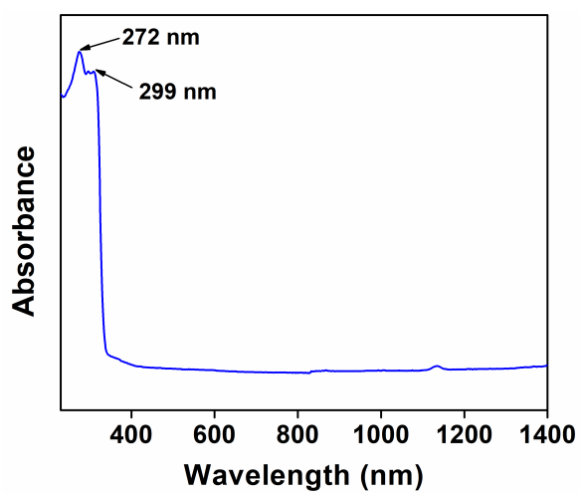

(a)

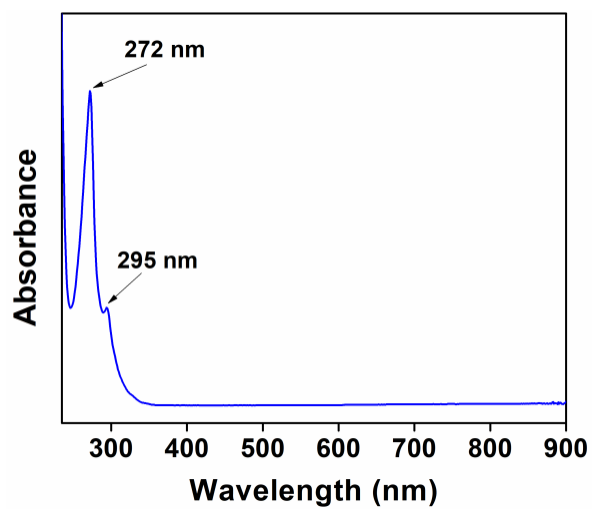

(b)

**Figure S5(a)** UV-Vis-NIR spectrum of **2**; **(b)** UV-Vis spectrum of **2** in water ( $10^{-3}$  M).

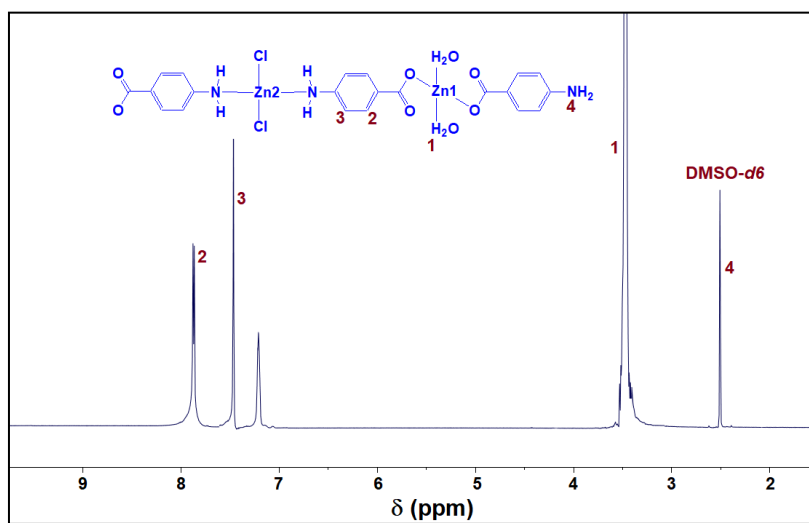

**Figure S6**  $^1\text{H}$ -NMR spectrum of compound **1** in  $\text{DMSO-}d_6$ .

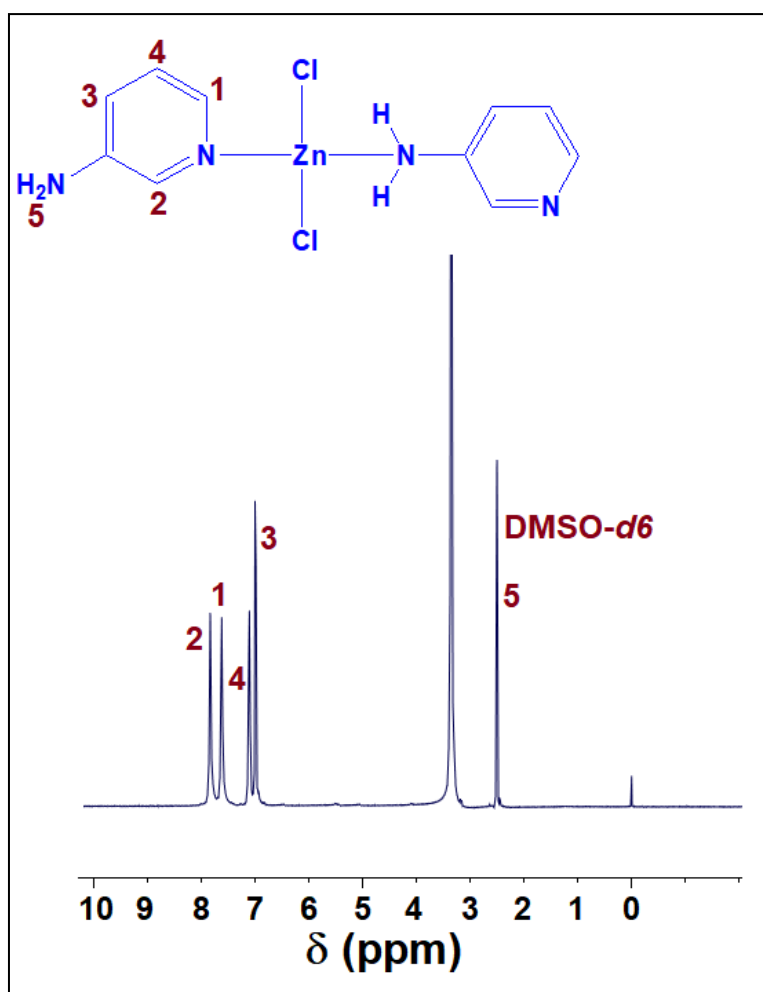

**Figure S7** <sup>1</sup>H-NMR spectrum of compound **2** in DMSO-*d*<sub>6</sub>.

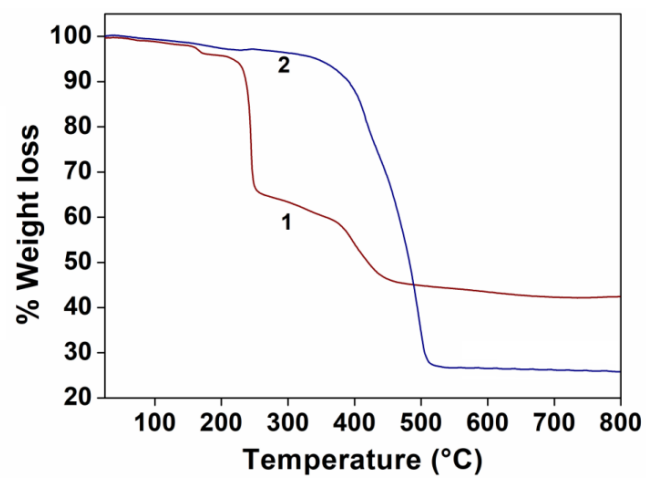

**Figure S8** Thermogravimetric curves of the compounds **1** and **2**.

**Table S2** IC<sub>50</sub> values (in  $\mu\text{M}$ ) of compounds **1**, **2**, ligands and metal salt calculated using dose response curves.

| Sl. Nos. | Drug candidates       | Cell lines | Nature of cell lines | IC <sub>50</sub> | Error (S.E.) |
|----------|-----------------------|------------|----------------------|------------------|--------------|
| 1.       | Cisplatin (Reference) | DL         | Malignant cancer     | 0.61             | 0.32         |
| 2.       | Compound <b>1</b>     | DL         | Malignant cancer     | 5.8              | 0.42         |
| 3.       | Compound <b>2</b>     | DL         | Malignant cancer     | 16.80            | 0.38         |
| 4.       | ZnCl <sub>2</sub>     | DL         | Malignant cancer     | 64               | 0.87         |
| 5.       | 4-AmBz                | DL         | Malignant cancer     | 318              | 2.52         |
| 6.       | 3-AmPy                | DL         | Malignant cancer     | 410              | 3.21         |
| 7.       | Compound <b>1</b>     | PBMC       | Normal cell          | 310              | 2.42         |
| 8.       | Compound <b>2</b>     | PBMC       | Normal cell          | 380              | 2.92         |
| 9.       | ZnCl <sub>2</sub>     | PBMC       | Normal cell          | 398              | 3.56         |
| 10.      | 4-AmBz                | PBMC       | Normal cell          | 418              | 3.55         |
| 11.      | 3-AmPy                | PBMC       | Normal cell          | 450              | 4.22         |
